# Supplementary material for: Structural, dynamical, and photochemical properties ofortho-tetrafluoroazobenzene inside a flexible MOF under visible light irradiation
Source: Royal Society of Chemistry journal article supplement (doi:10.1039/d0ra10500g), 2021-01-01
Supplement: d0ra10500g1.pdf [file d0ra10500g1.pdf]

## Supporting Information

Markus Rödl<sup>a</sup>, Samuel Kerschbaumer<sup>a</sup>, Holger Kopacka<sup>a</sup>, Laura Blaser<sup>a</sup>, Felix R. S. Purtscher<sup>a</sup>, Hubert Huppertz<sup>a</sup>, Thomas S. Hofer<sup>a,\*</sup> and Heidi A. Schwartz<sup>a,\*</sup>

<sup>a</sup>*Institute of General, Inorganic and Theoretical Chemistry, University of Innsbruck, Innrain 80-82, A-6020 Innsbruck, Austria.*

*Corresponding author main: Heidi A. Schwartz*

*E-mail: heidi.schwartz@uibk.ac.at*

*Corresponding author theory: Thomas S. Hofer*

*E-mail: t.hofer@uibk.ac.at*

### Content

**Figures S1 to S5.** XRPD patterns of systems **1** to **5** compared to unloaded DMOF-1 and *tF*-AZB.

**Figure S6.** Diffraction patterns of systems **1** to **5** compared to theoretical patterns of un-loaded DMOF-1 and benzene-loaded DMOF-1.

**Figure S7 to S21.** <sup>1</sup>H NMR spectra of systems **1** to **5** digested in 1 ml of DMSO-*d*<sub>6</sub> and 25 μl of DCl before and after irradiation with blue and green light, respectively.

**Figure S22.** Diffraction patterns of system **4** and system **5**, when non-irradiated, irradiated with blue light and green light.

**Figures S23 to S24.** IR spectra of systems **2** (top) and system **4** (bottom), when irradiated with blue light (blue lines) and green light (green lines) compared to pure DMOF-1.

**Figure S25.** Comparison of a) the calculated IR spectra obtained from the SCC DFTB MD simulations against b) the experimental reference for DMOF-1 as well as the *E/Z-tF*-AZB@DMOF-1 complexes. Bands in the high energy range are not accessible in this case due to the rigid-body constraints applied to all X-H bonds.

**Figure S26.** a) Calculated IR spectra determined from the SCC DFTB MD simulations for DMOF-1 as well as the *E/Z-tF*-AZB@DMOF-1 complexes. b) Calculated IR spectra obtained by considering only the contributions of the *E/Z-tf*-AZB molecules in DMOF-1.

**Figure S27.** Average XRPD pattern of DMOF-1 obtained by averaging 5000 individual patterns computed for every 5<sup>th</sup> configuration of the MD sampling phase.

**Figure S28.** Comparison of the XRPD pattern for empty DMOF-1 obtained via a single minimum configuration and thermal averaging over the MD trajectory against the experimental reference.

**Figures S29 and S30.**  $^1\text{H}$  and  $^{19}\text{F}$  NMR spectra of *tF*-AZB.

**Figure S31.** Diffraction pattern of unloaded DMOF-1 in comparison to the peak intensities and position calculated from theoretical data.

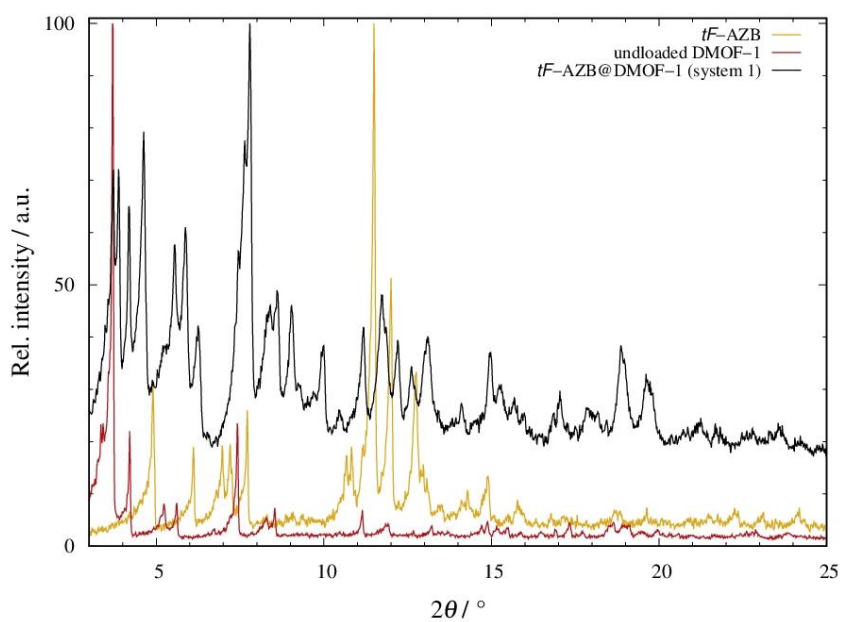

**Figure S1.** Diffraction pattern of unloaded *tF*-AZB@DMOF-1 (system 1) (black line), pristine *tF*-AZB (orange line) and unloaded DMOF-1 (red line). The diffraction patterns were measured at 298 K (Stoe Stadi P:  $\lambda = 0.7093 \text{ \AA}$ ).

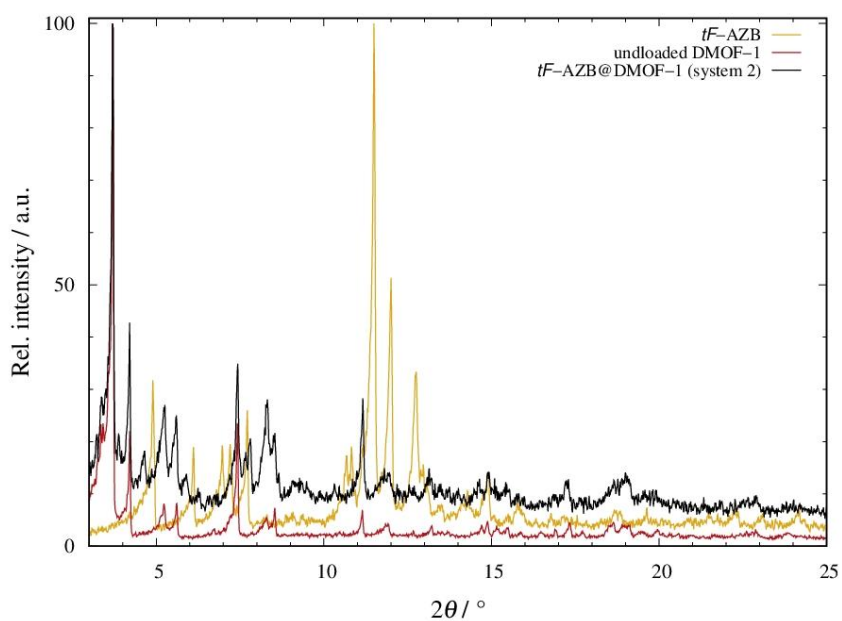

**Figure S2.** Diffraction pattern of unloaded *tF*-AZB@DMOF-1 (system 2) (black line), pristine *tF*-AZB (orange line) and unloaded DMOF-1 (red line). The diffraction patterns were measured at 298 K (Stoe Stadi P:  $\lambda = 0.7093 \text{ \AA}$ ).

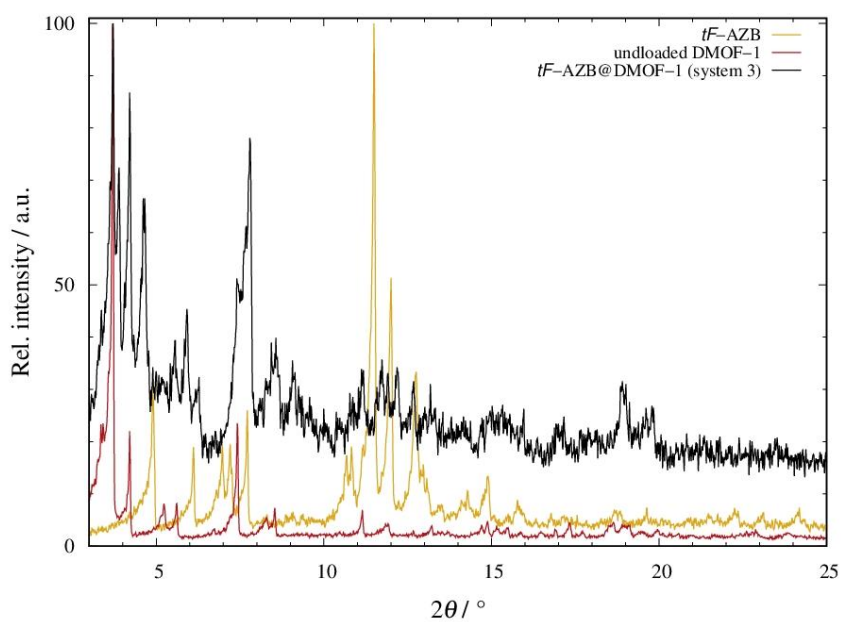

**Figure S3.** Diffraction pattern of unloaded *tF*-AZB@DMOF-1 (system **3**) (black line), pristine *tF*-AZB (orange line) and unloaded DMOF-1 (red line). The diffraction patterns were measured at 298 K (*Stoe Stadi P*:  $\lambda = 0.7093 \text{ \AA}$ ).

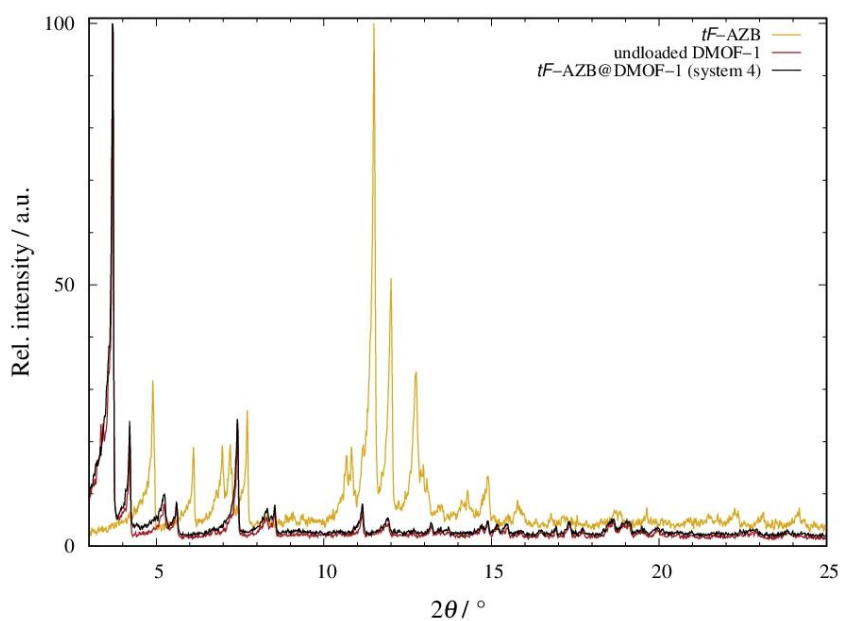

**Figure S4.** Diffraction pattern of unloaded *tF*-AZB@DMOF-1 (system **4**) (black line), pristine *tF*-AZB (orange line) and unloaded DMOF-1 (red line). The diffraction patterns were measured at 298 K (*Stoe Stadi P*:  $\lambda = 0.7093 \text{ \AA}$ ).

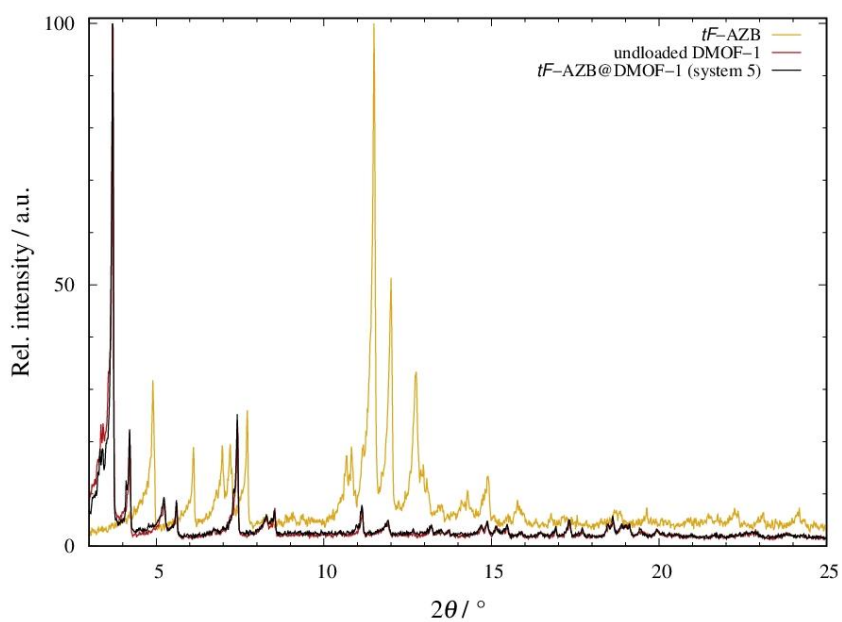

**Figure S5.** Diffraction pattern of unloaded  $tF$ -AZB@DMOF-1 (system **5**) (black line), pristine  $tF$ -AZB (orange line) and unloaded DMOF-1 (red line). The diffraction patterns were measured at 298 K (*Stoe Stadi P*:  $\lambda = 0.7093 \text{ \AA}$ ).

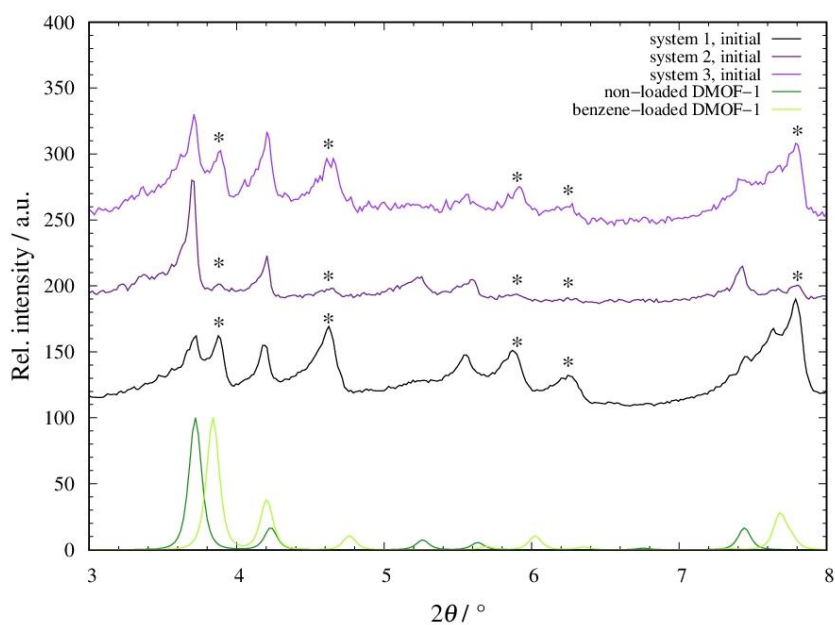

**Figure S6.** Diffraction patterns of systems **1** to **3** (purple lines) and theoretical patterns of un-loaded DMOF-1 (dark-green line), and benzene-loaded DMOF-1 (light-green line). The diffraction patterns of systems **1** to **5** were measured at 298 K (*Stoe Stadi P*:  $\lambda = 0.7093 \text{ \AA}$ ).

## NMR-spectroscopic investigations

Processing of the NMR data was conducted using *MestReNova 9.0.1-13254*. Here, the ratio of *tF*-AZB to DMOF-1 was calculated via integrating the respective proton signal of terephthalic acid (approx. 8 ppm) to the *Z* isomer and *E* isomer proton signals of *tF*-AZB following the work of *Benedict* and co-workers<sup>[2]</sup>.

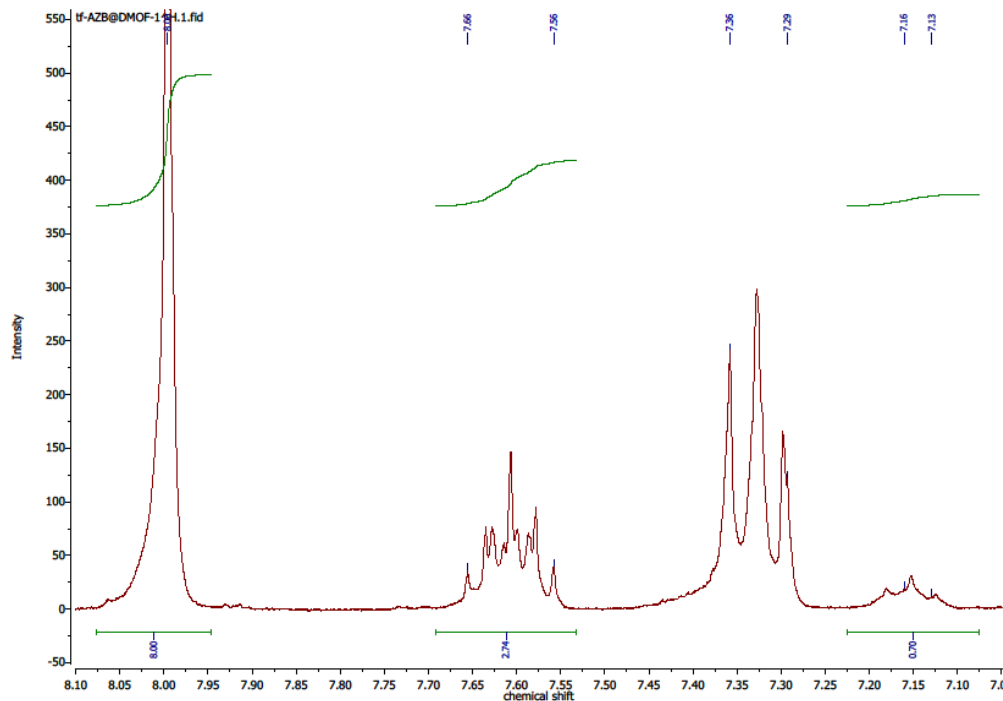

**Figure S7.** <sup>1</sup>H NMR spectrum of *tF*-AZB@DMOF-1 (system 1) digested in 1 ml of DMSO-*d*<sub>6</sub> and 25 μl of DCl. Integration of the terephthalic acid protons and the *tF*-AZB protons indicate a ratio of 1.5:1 *tF*-AZB to DMOF-1. The *E/Z* ratio of the non-irradiated state was found to be 88.7:11.3.

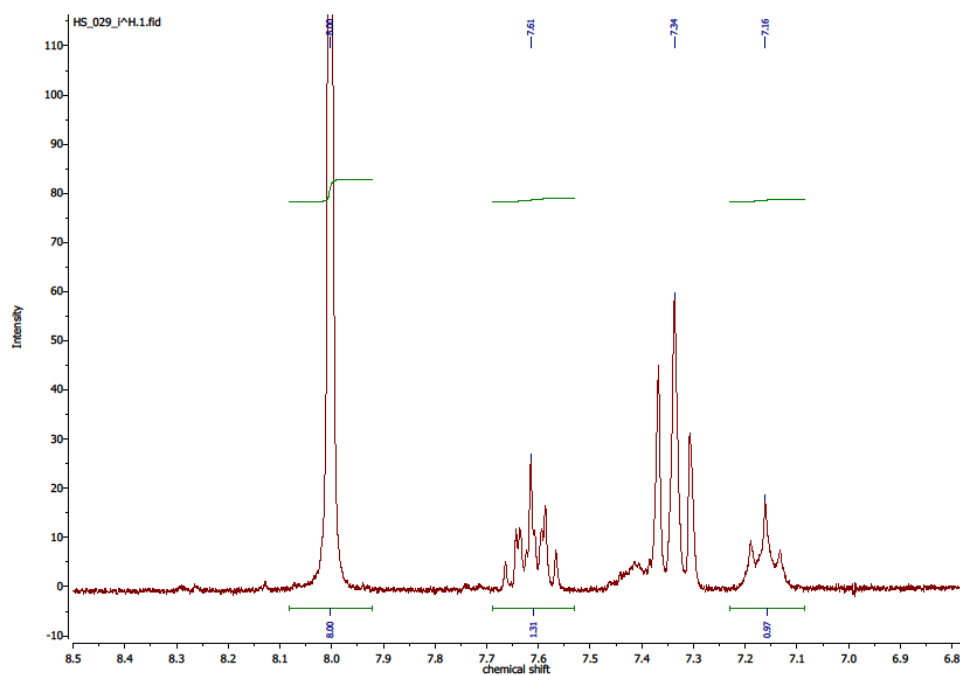

**Figure S8.**  $^1\text{H}$  NMR spectrum of *tF*-AZB@DMOF-1 (system **2**) digested in 1 ml of  $\text{DMSO-}d_6$  and 25  $\mu\text{l}$  of DCl. Integration of the terephthalic acid protons and the *tF*-AZB protons indicate a ratio of 1:1 *tF*-AZB to DMOF-1. The *E/Z* ratio of the non-irradiated state was found to be 72.4:27.6.

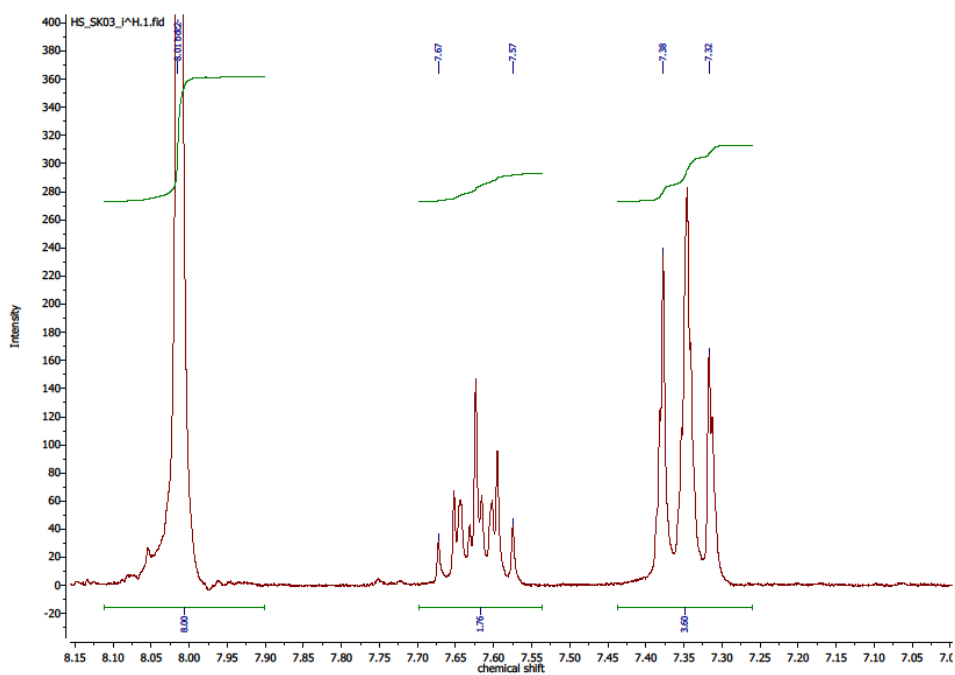

**Figure S9.**  $^1\text{H}$  NMR spectrum of *tF*-AZB@DMOF-1 (system **3**) digested in 1 ml of  $\text{DMSO-}d_6$  and 25  $\mu\text{l}$  of DCl. Integration of the terephthalic acid protons and the *tF*-AZB protons indicate a ratio of 0.9:1 *tF*-AZB to DMOF-1. The *E/Z* ratio of the non-irradiated state was found to be 100% *E* isomer.

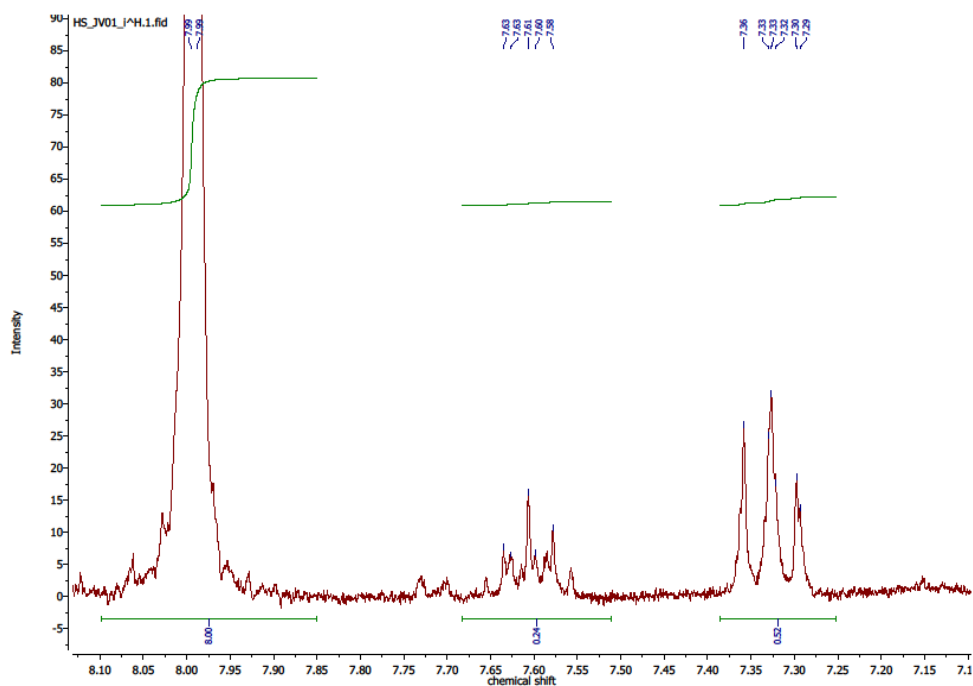

**Figure S10.**  $^1\text{H}$  NMR spectrum of *tF*-AZB@DMOF-1 (system **4**) digested in 1 ml of  $\text{DMSO-}d_6$  and 25  $\mu\text{l}$  of DCl. Integration of the terephthalic acid protons and the *tF*-AZB protons indicate a ratio of 0.125:1 *tF*-AZB to DMOF-1. The *E/Z* ratio of the non-irradiated state was found to be 100% *E* isomer.

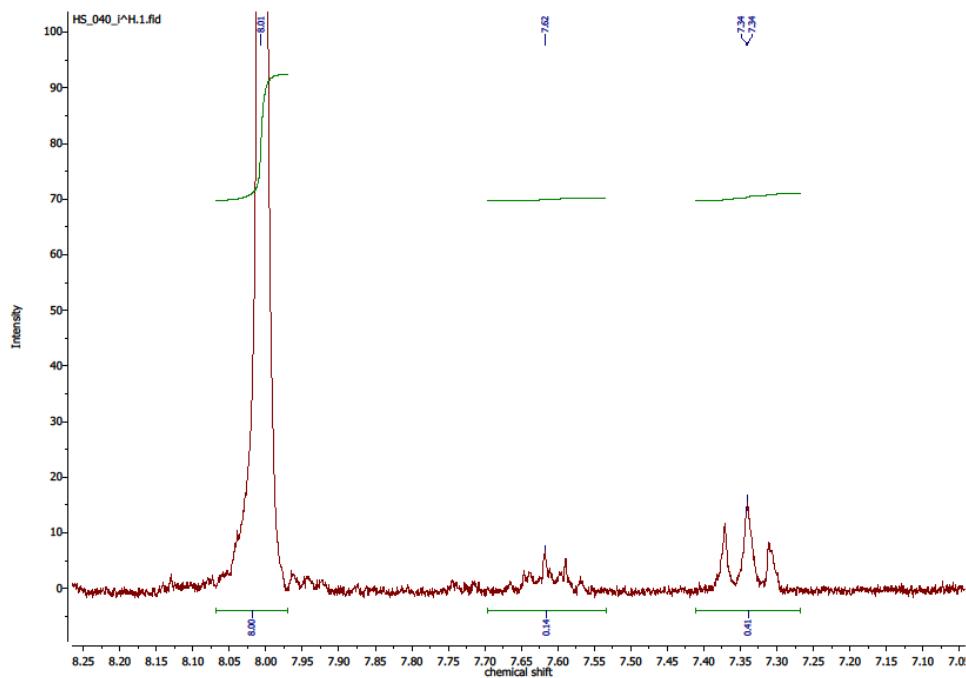

**Figure S11.**  $^1\text{H}$  NMR spectrum of *tF*-AZB@DMOF-1 (system **5**) digested in 1 ml of  $\text{DMSO-}d_6$  and 25  $\mu\text{l}$  of DCl. Integration of the terephthalic acid protons and the *tF*-AZB protons indicate a ratio of 0.125:1 *tF*-AZB to DMOF-1. The *E/Z* ratio of the non-irradiated state was found to be 100% *E* isomer.



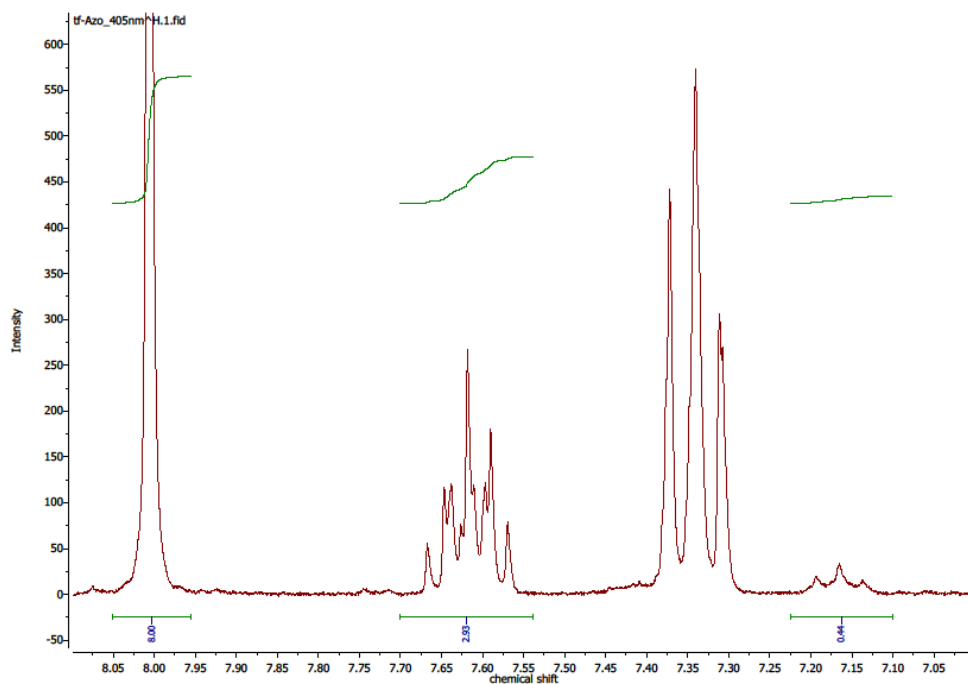

**Figure S12.** <sup>1</sup>H NMR spectrum of *tF*-AZB@DMOF-1 (system **1**) digested in 1 ml of DMSO-*d*<sub>6</sub> and 25 µl of DCl after irradiation with blue light ( $\lambda = 405$  nm) for 15 min. The *E/Z* ratio was found to be 93% *E* isomer.

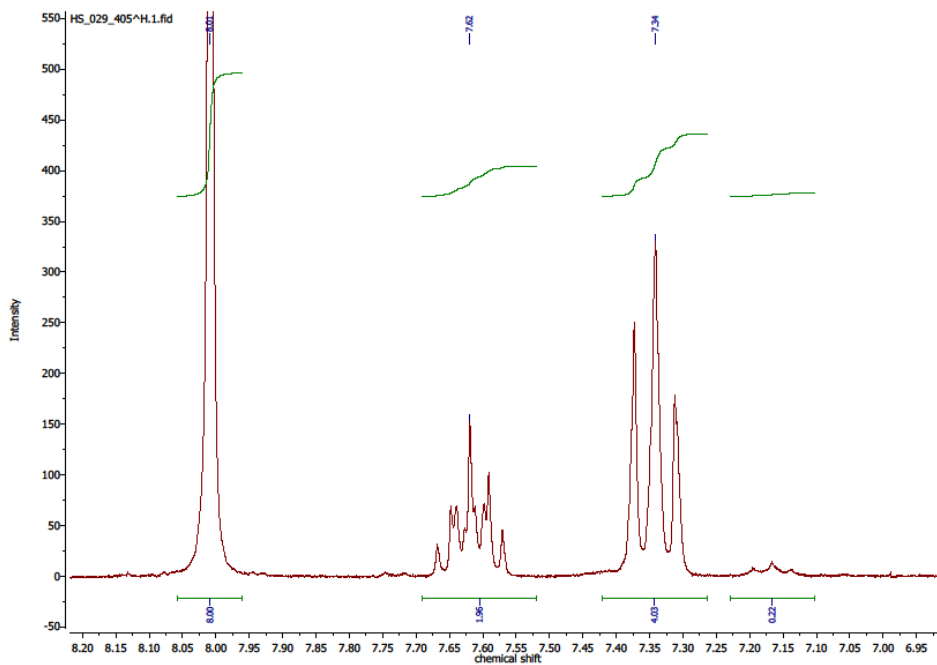

**Figure S13.** <sup>1</sup>H NMR spectrum of *tF*-AZB@DMOF-1 (system **2**) digested in 1 ml of DMSO-*d*<sub>6</sub> and 25 µl of DCl after irradiation with blue light ( $\lambda = 405$  nm) for 15 min. The *E/Z* ratio was found to be 94.6% *E* isomer.

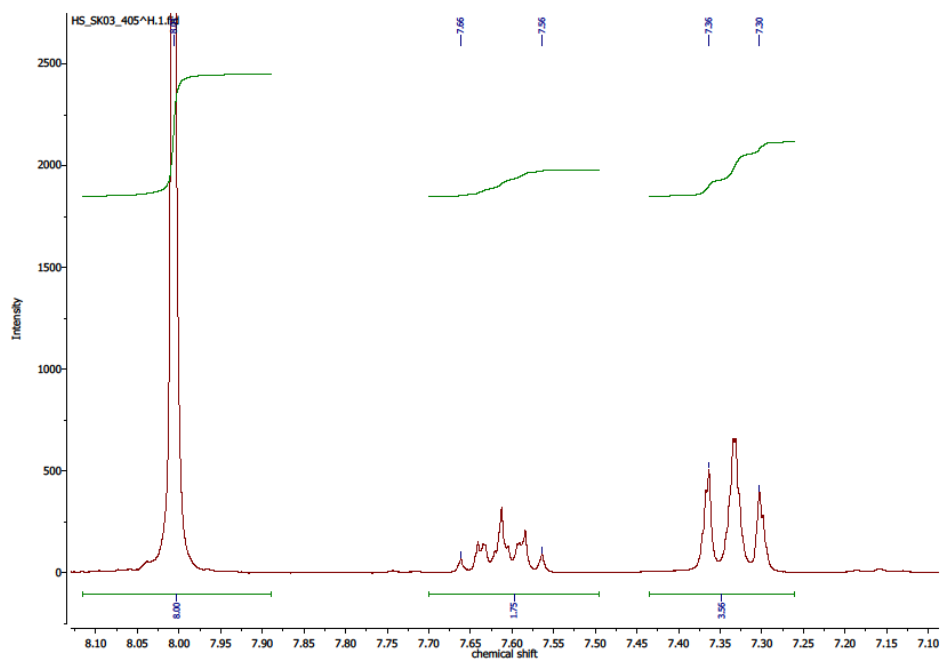

**Figure S14.**  $^1\text{H}$  NMR spectrum of *tF*-AZB@DMOF-1 (system **3**) digested in 1 ml of  $\text{DMSO-}d_6$  and 25  $\mu\text{l}$  of DCl after irradiation with blue light ( $\lambda = 405$  nm) for 15 min. The *E/Z* ratio was found to be 96% *E* isomer.

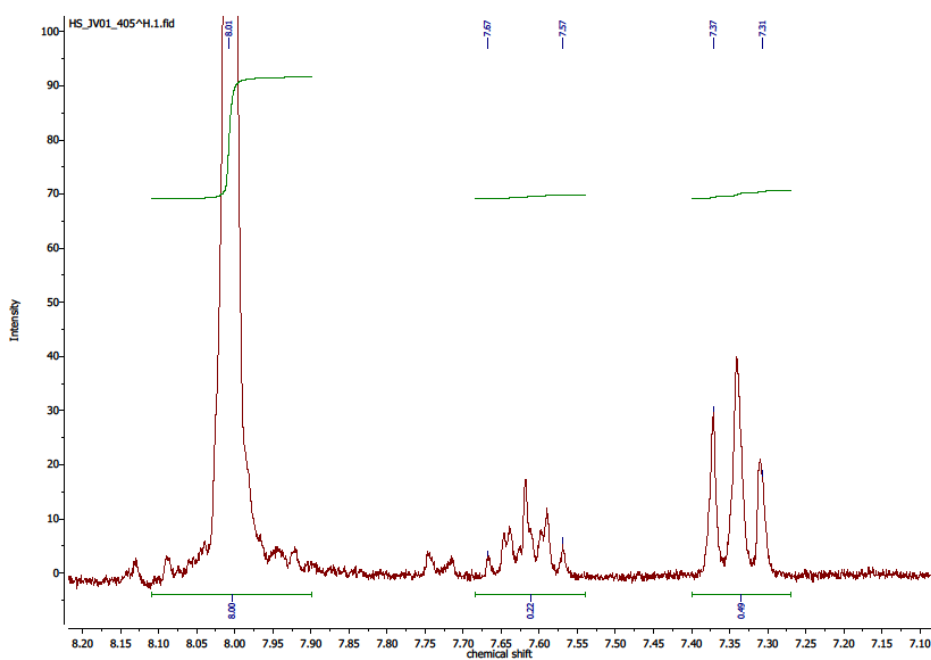

**Figure S15.**  $^1\text{H}$  NMR spectrum of *tF*-AZB@DMOF-1 (system **4**) digested in 1 ml of  $\text{DMSO-}d_6$  and 25  $\mu\text{l}$  of DCl after irradiation with blue light ( $\lambda = 405$  nm) for 15 min. The *E/Z* ratio was found to be 100% *E* isomer.

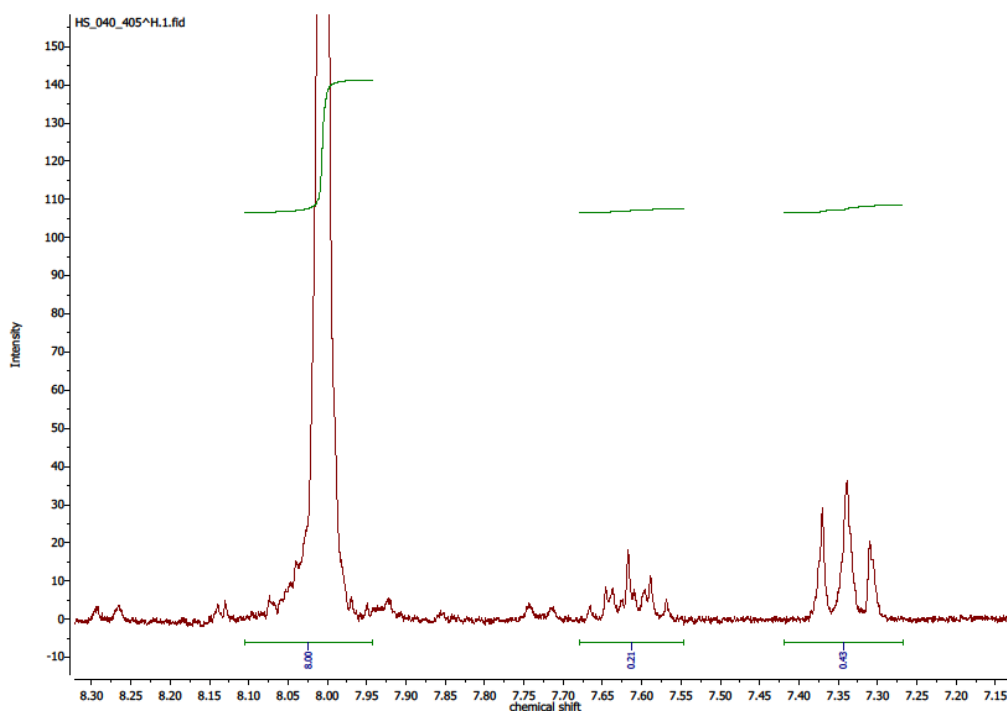

**Figure S16.**  $^1\text{H}$  NMR spectrum of *tF*-AZB@DMOF-1 (system **5**) digested in 1 ml of  $\text{DMSO-}d_6$  and  $25\ \mu\text{l}$  of DCl after irradiation with blue light ( $\lambda = 405\ \text{nm}$ ) for 15 min. The *E/Z* ratio was found to be 100% *E* isomer.

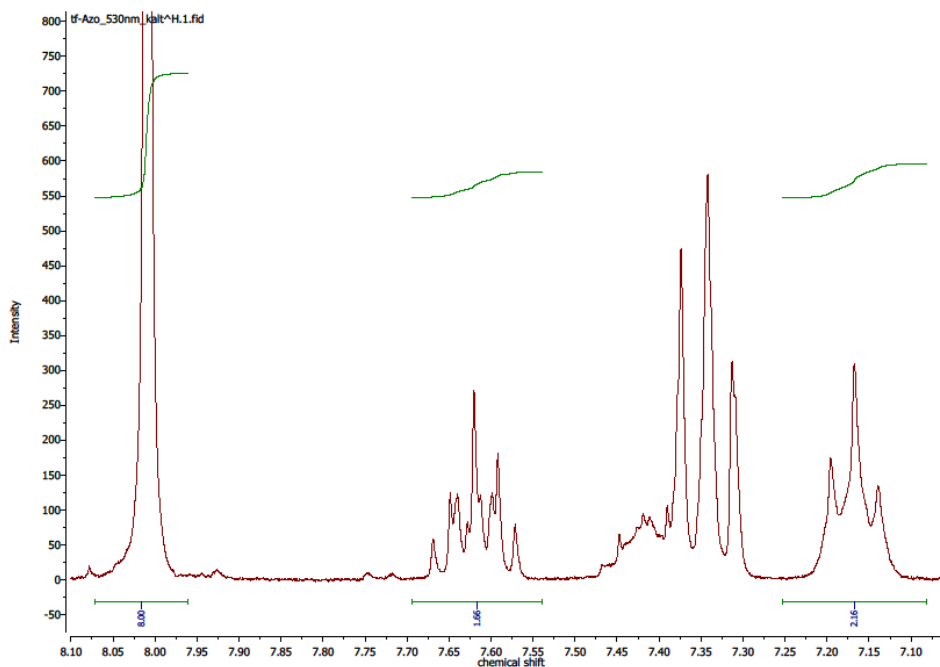

**Figure S17.**  $^1\text{H}$  NMR spectrum of *tF*-AZB@DMOF-1 (system **1**) digested in 1 ml of  $\text{DMSO-}d_6$  and  $25\ \mu\text{l}$  of DCl after irradiation with blue light ( $\lambda = 535\ \text{nm}$ ) for 15 min. The *E/Z* ratio was found to be 60.5% *E* isomer.

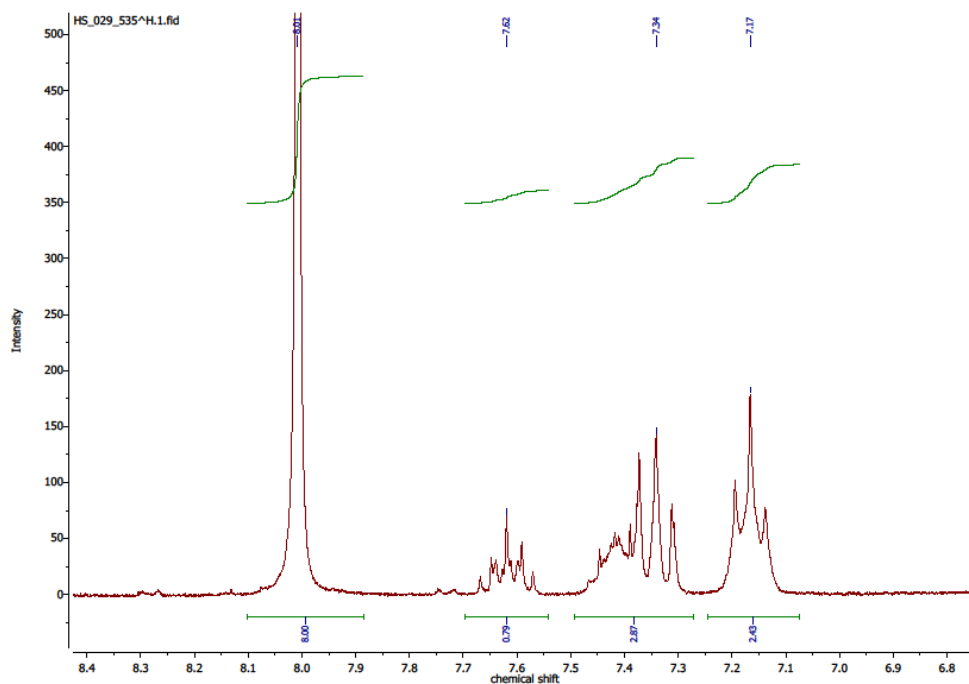

**Figure S18.**  $^1\text{H}$  NMR spectrum of *tF*-AZB@DMOF-1 (system **2**) digested in 1 ml of  $\text{DMSO-}d_6$  and 25  $\mu\text{l}$  of DCl after irradiation with blue light ( $\lambda = 535$  nm) for 15 min. The *E/Z* ratio was found to be 39.3% *E* isomer.

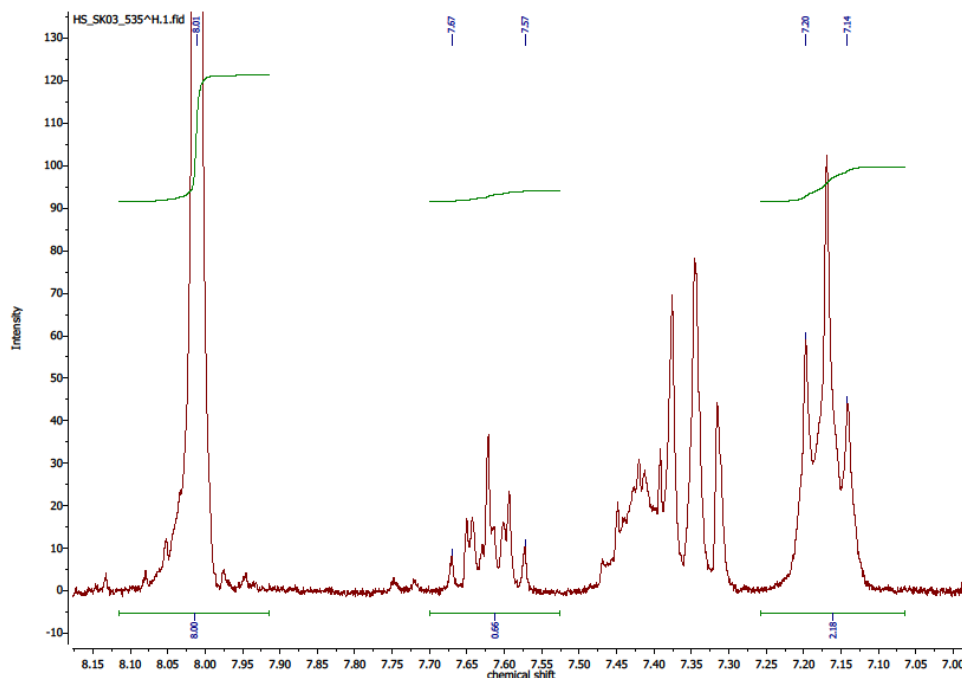

**Figure S19.**  $^1\text{H}$  NMR spectrum of *tF*-AZB@DMOF-1 (system **3**) digested in 1 ml of  $\text{DMSO-}d_6$  and 25  $\mu\text{l}$  of DCl after irradiation with blue light ( $\lambda = 535$  nm) for 15 min. The *E/Z* ratio was found to be 37.7% *E* isomer.

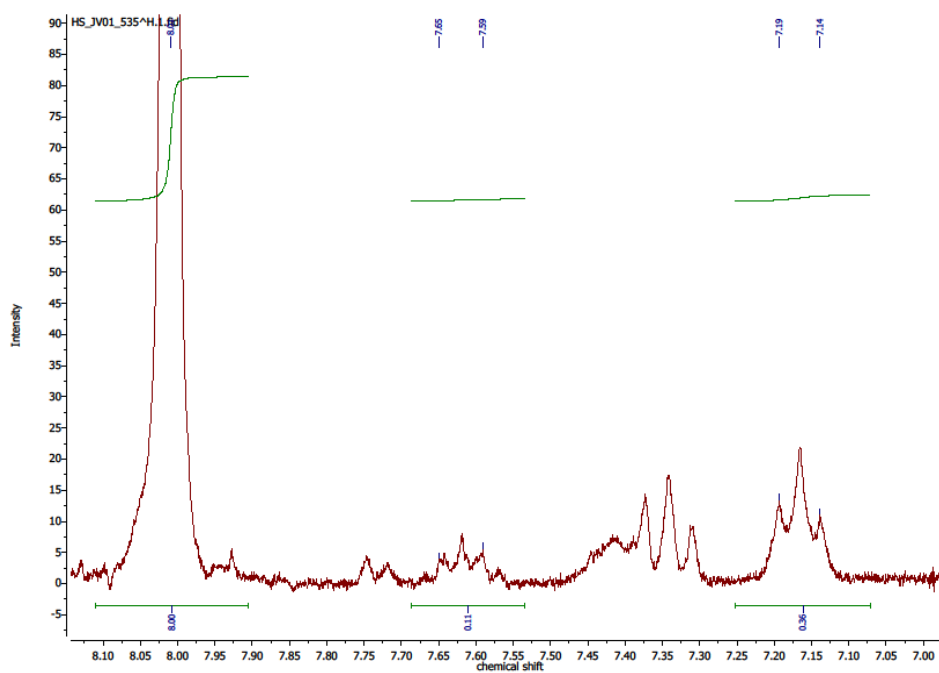

**Figure S20.**  $^1\text{H}$  NMR spectrum of *tF*-AZB@DMOF-1 (system **4**) digested in 1 ml of  $\text{DMSO-}d_6$  and 25  $\mu\text{l}$  of DCl after irradiation with blue light ( $\lambda = 535$  nm) for 15 min. The *E/Z* ratio was found to be 38% *E* isomer.

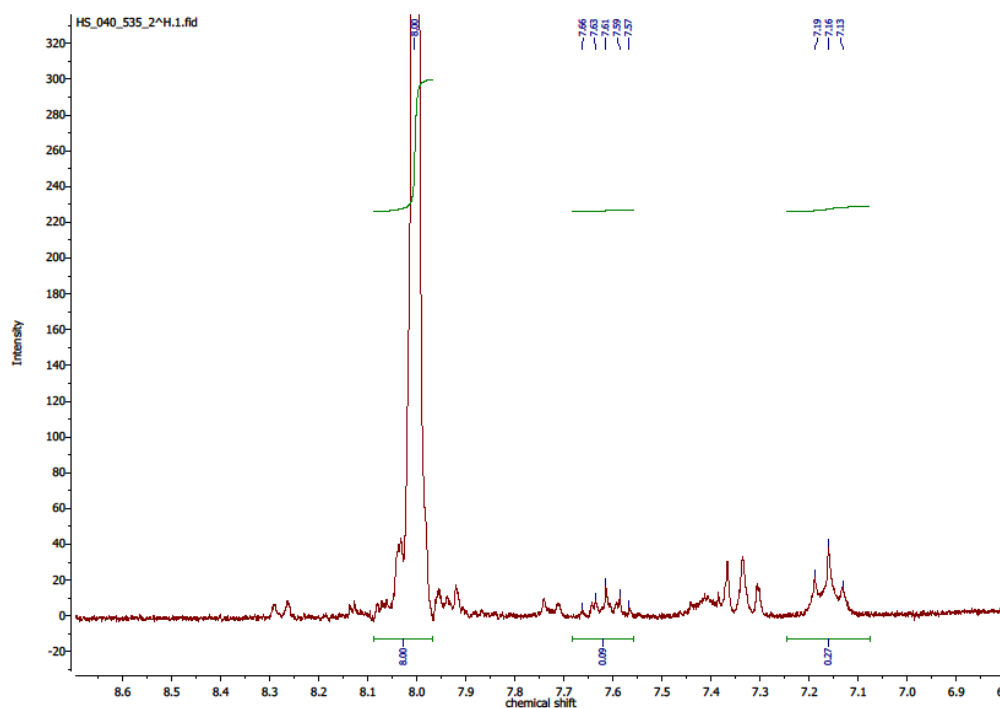

**Figure S21.**  $^1\text{H}$  NMR spectrum of *tF*-AZB@DMOF-1 (system **5**) digested in 1 ml of  $\text{DMSO-}d_6$  and 25  $\mu\text{l}$  of DCl after irradiation with blue light ( $\lambda = 535$  nm) for 15 min. The *E/Z* ratio was found to be 40% *E* isomer.

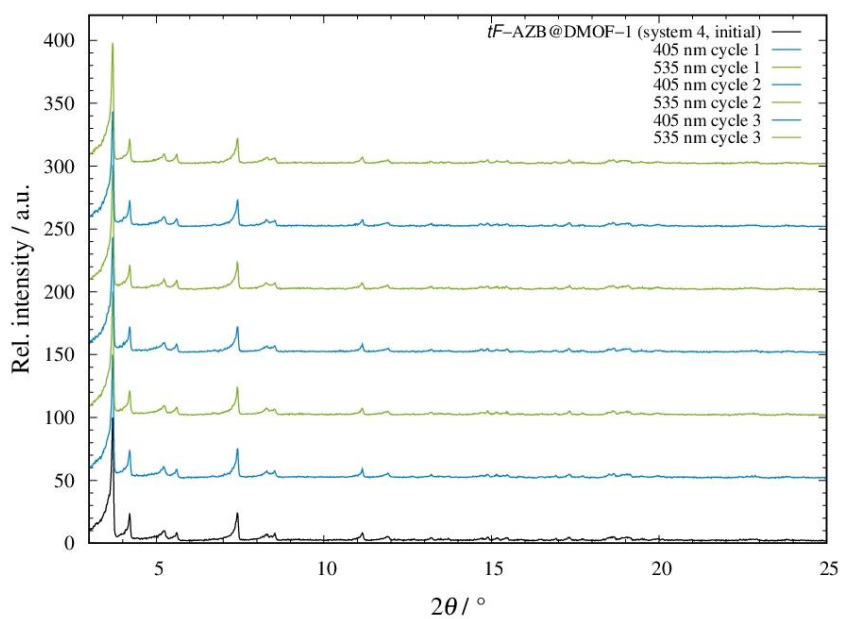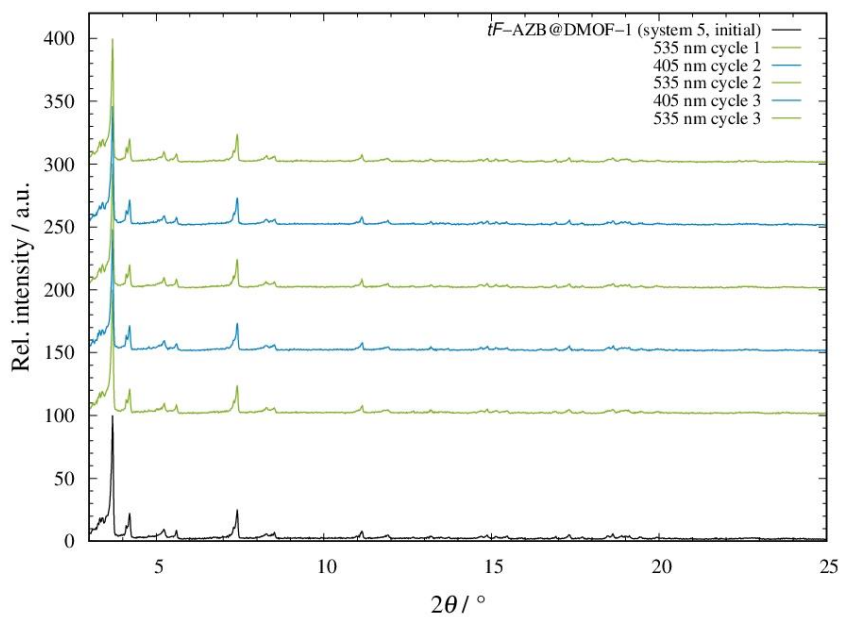

**Figure S22.** Diffraction patterns of system 4 (top) and system 5 (bottom), when non-irradiated (black line), irradiated with blue light (blue lines) and green light (green lines) with off-set. The diffraction patterns were measured at 298 K (*Stoe Stadi P*:  $\lambda = 0.7107 \text{ \AA}$ ).

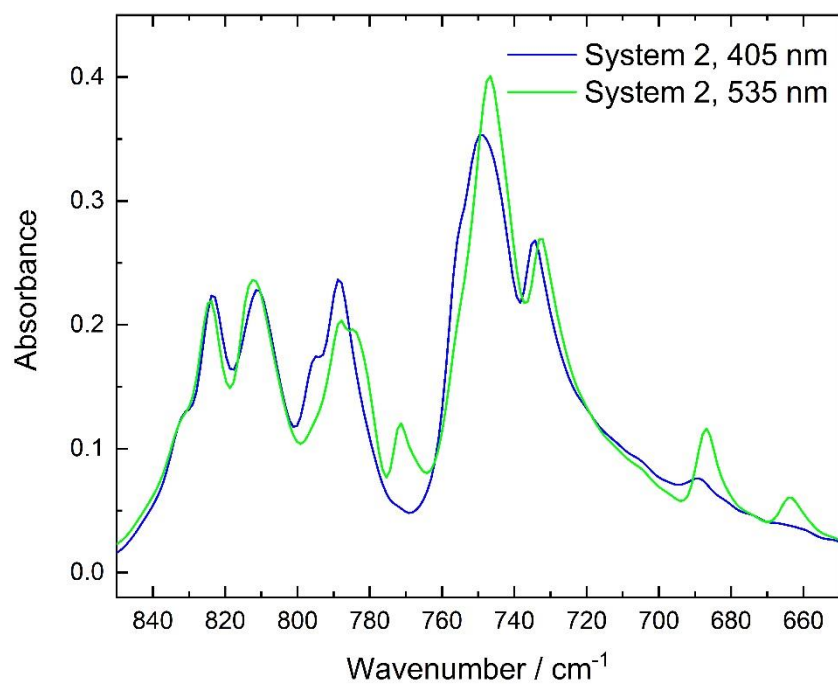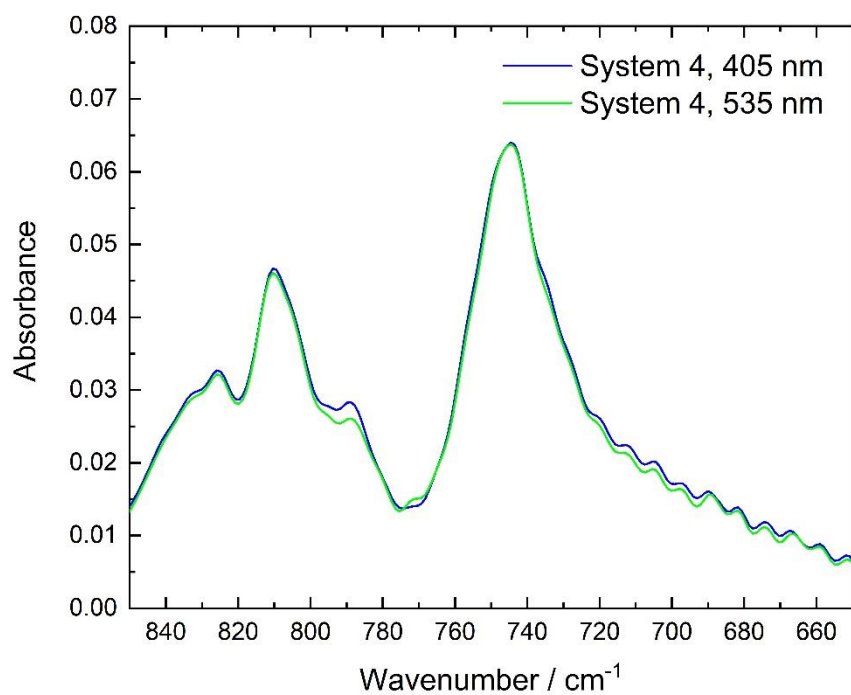

**Figure S23.** IR spectra of systems **2** (top) and system **4** (bottom), when irradiated with blue light (blue lines) and green light (green lines). Irradiation was carried out for 5 min under an argon atmosphere.

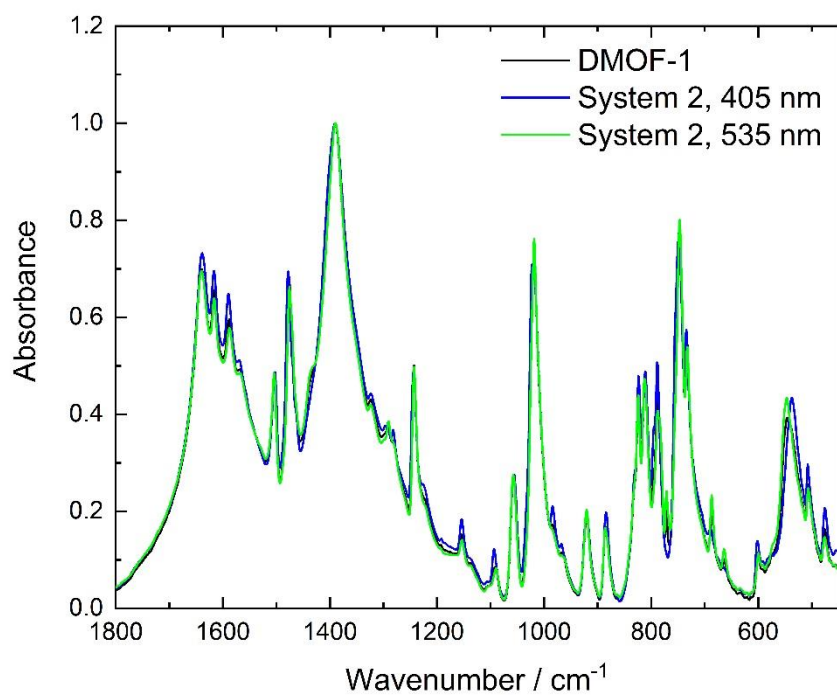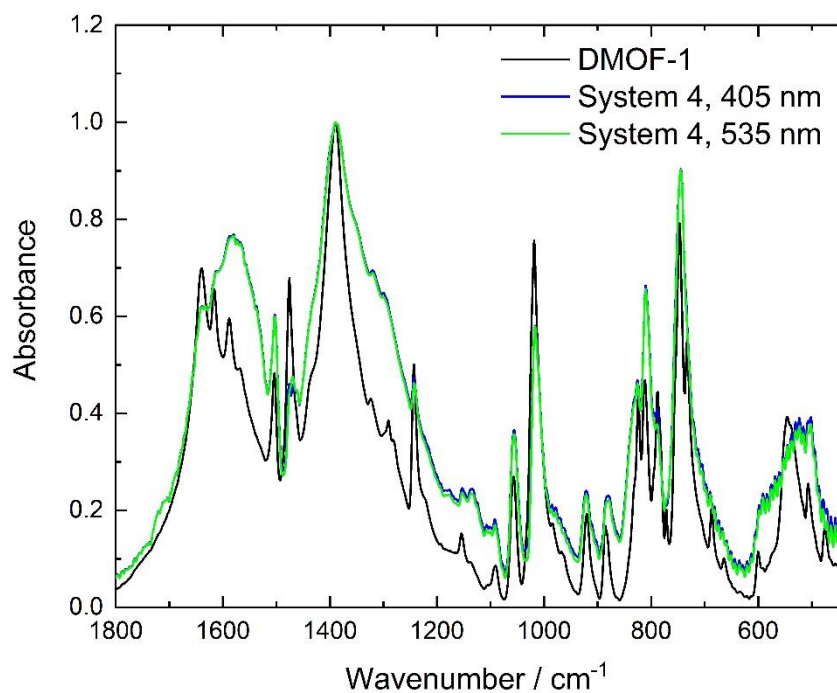

**Figure S24.** IR spectra of systems **2** (top) and system **4** (bottom), when irradiated with blue light (blue lines) and green light (green lines) compared to pure DMOF-1. Irradiation was carried out for 5 min under an argon atmosphere.



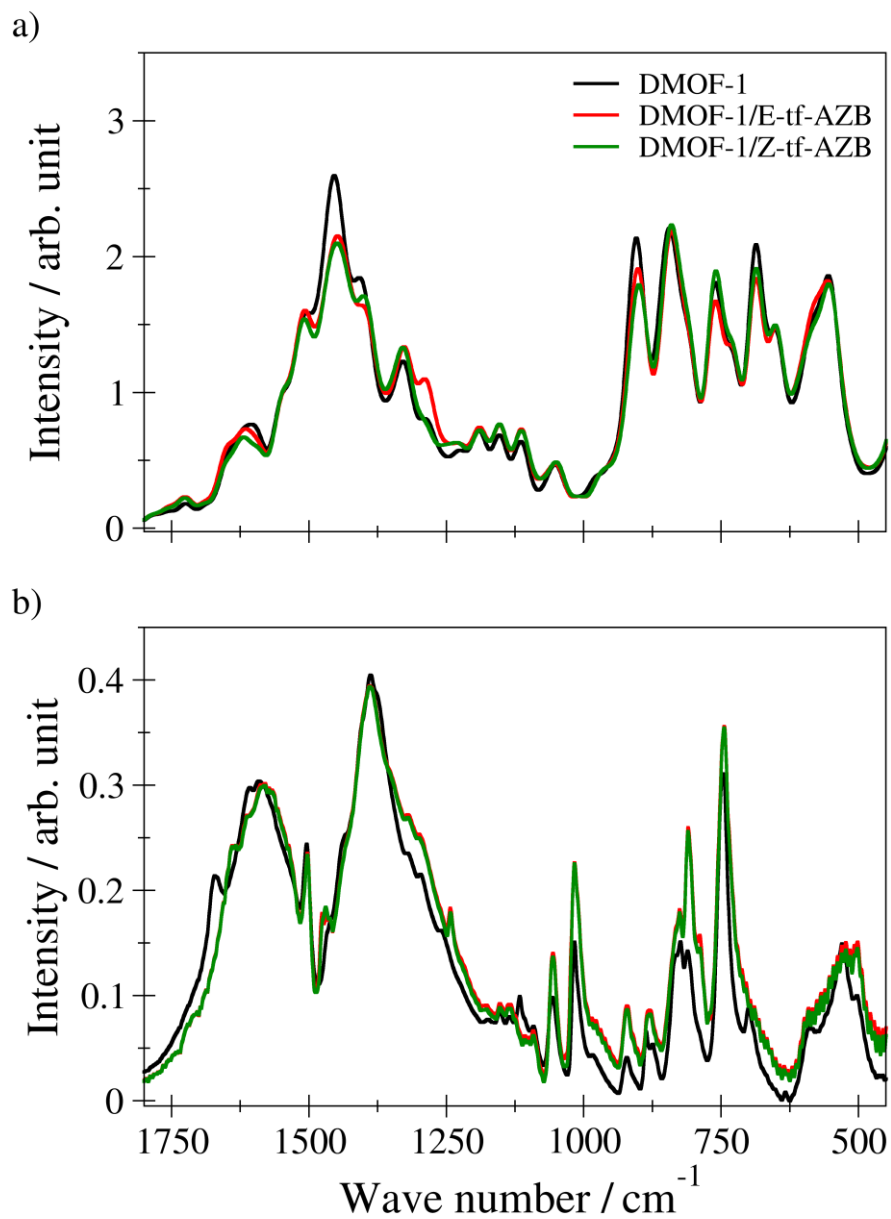

**Figure S25.** Comparison of a) the calculated IR spectra obtained from the SCC DFTB MD simulations against b) the experimental reference for DMOF-1 as well as the *E/Z-tf-AZB*@DMOF-1 complexes. Bands in the high energy range are not accessible in this case due to the rigid-body constraints applied to all X-H bonds.

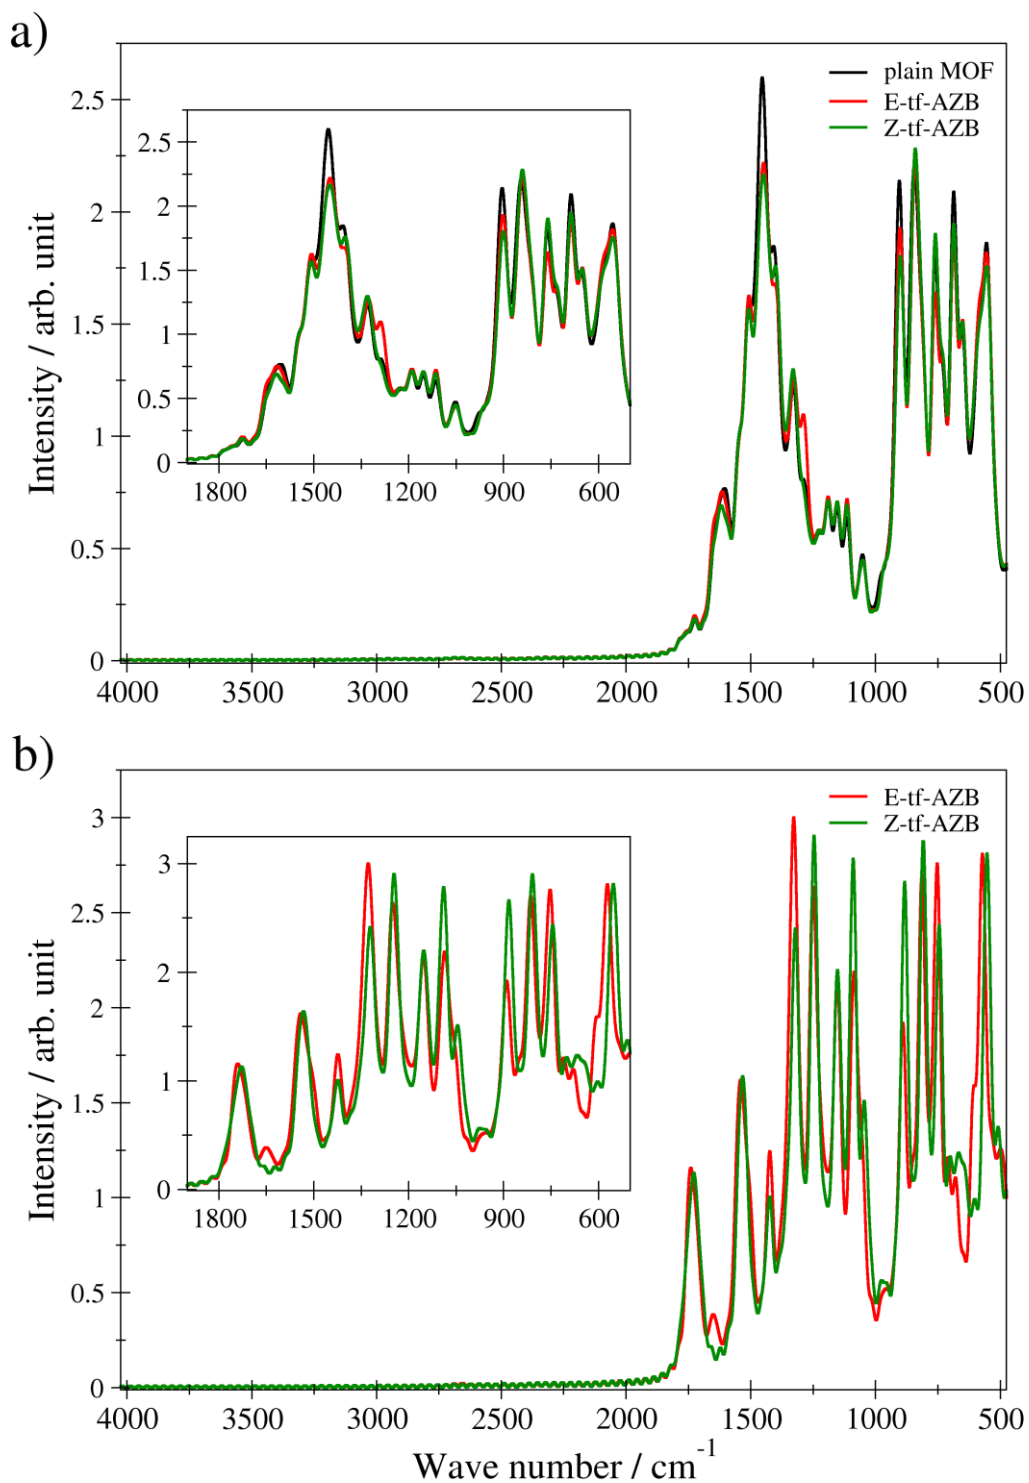

**Figure S26.** a) Calculated IR spectra determined from the SCC DFTB MD simulations for DMOF-1 as well as the *E/Z-tf-AZB*@DMOF-1 complexes. b) Calculated IR spectra obtained by considering only the contributions of the *E/Z-tf-AZB* molecules in DMOF-1.

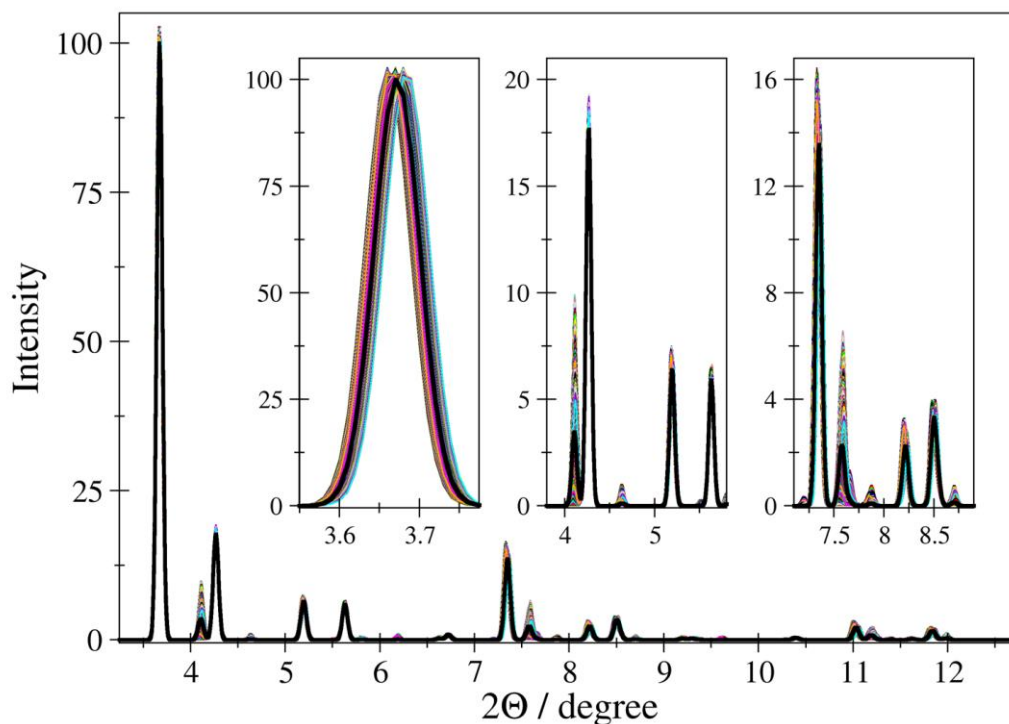

**Figure S27.** Average XRPD pattern (black) of DMOF-1 obtained by averaging 5000 individual patterns (color) computed for every 5<sup>th</sup> configuration of the MD sampling phase. All patterns were scaled with respect to the average XRPD pattern, which has been normalized to 100.

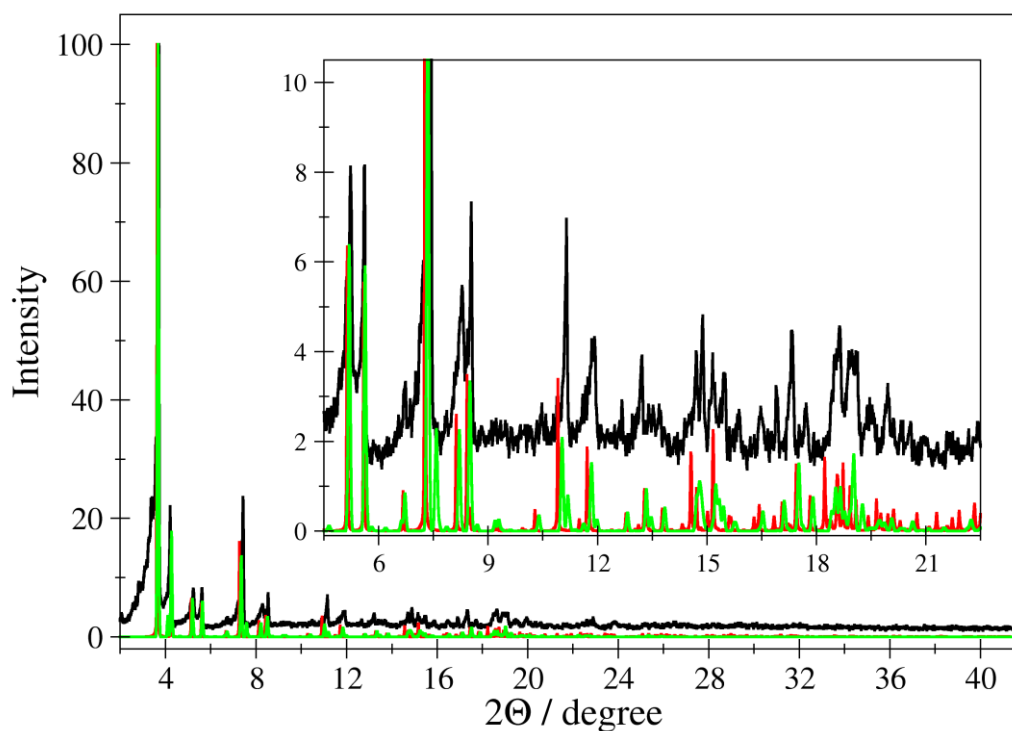

**Figure S28.** Comparison of the XRPD pattern for empty DMOF-1 obtained via a single minimum configuration (red) and thermal averaging over the MD trajectory (green) against the experimental reference (black). All patterns have been normalized to a maximum value of 100.

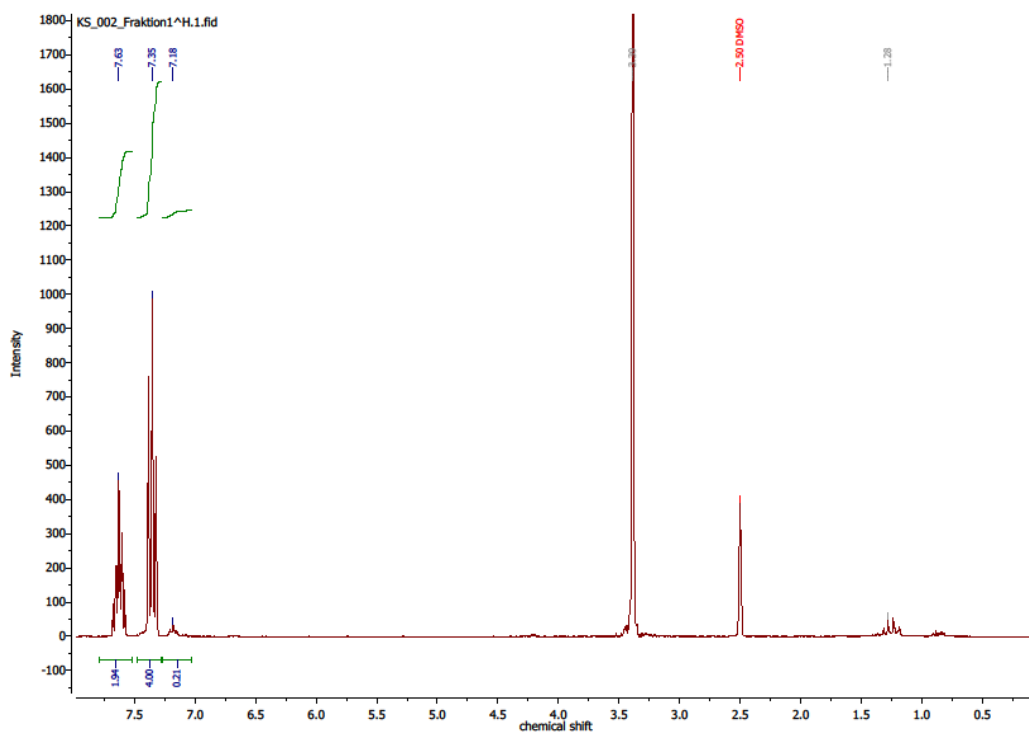

**Figure S29.**  $^1\text{H}$  NMR spectrum of *tF*-AZB digested in  $\text{DMSO-}d_6$ . Impurities at  $<1.5$  ppm originate from grease.

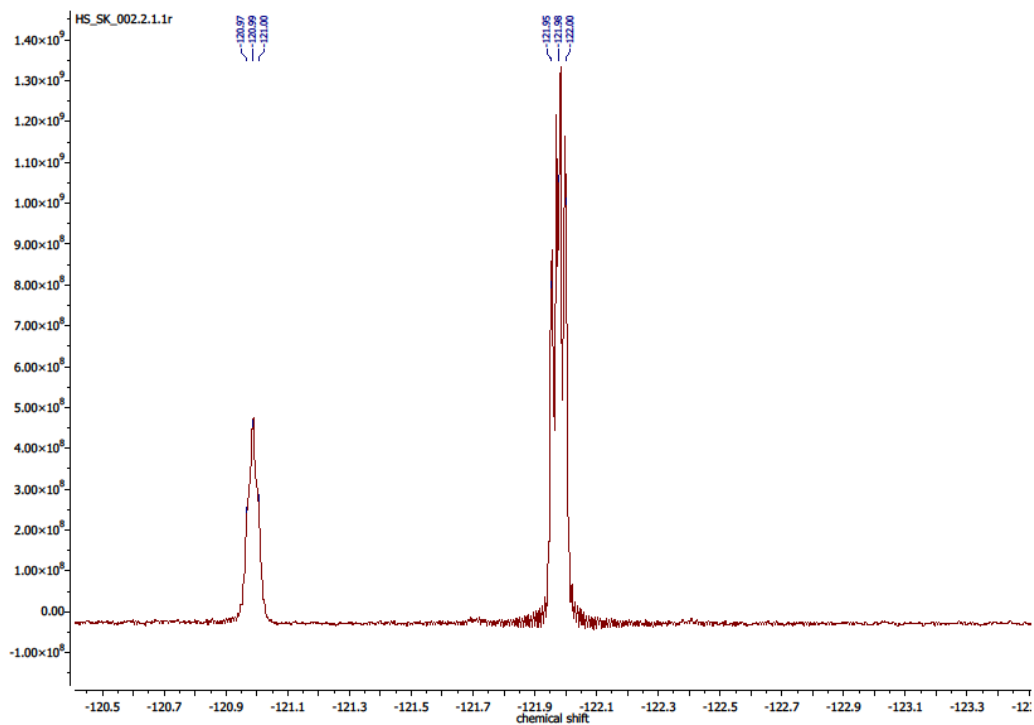

**Figure S30.**  $^{19}\text{F}$  NMR spectrum of *tF*-AZB digested in  $\text{DMSO-}d_6$ .

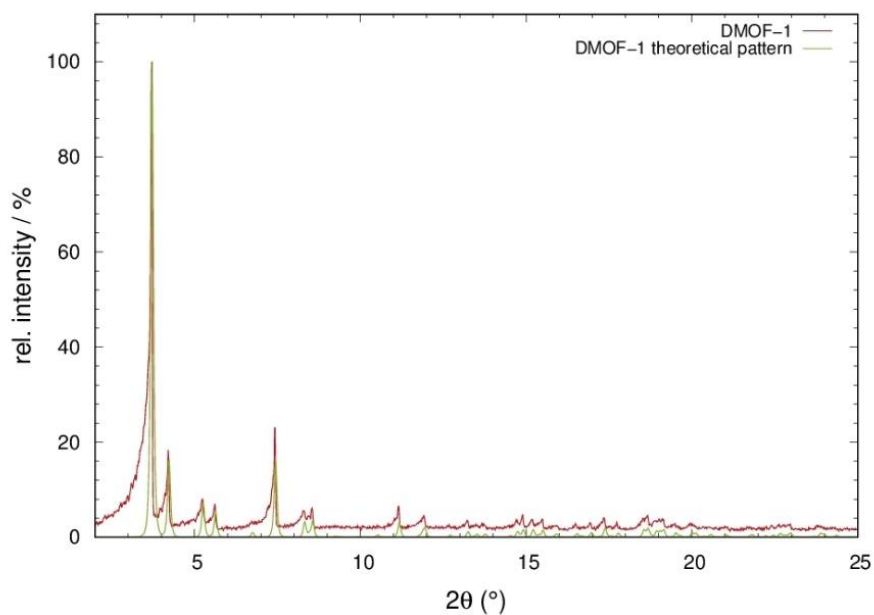

**Figure S31.** Diffraction pattern of unloaded DMOF-1 (red line) in comparison to the peak intensities and position calculated from theoretical data<sup>[1]</sup> (green line). The diffraction pattern was measured at 298 K (*Stoe Stadi P*:  $\lambda = 0.7093 \text{ \AA}$ ).

## References

- [1] D. N. Dybtsev, H. Chun, K. Kim, *Angew. Chem. - Int. Ed.* **2004**, *43*, 5033–5036.
- [2] I. M. Walton, J. M. Cox, J. A. Coppin, C. M. Linderman, D. G. (Dan) Patel, J. B. Benedict, H. Ren, G. Zhu, *Chem. Commun.* **2013**, *49*, 8012–8014.
